# Supplementary material for: 3D-QSAR, Docking, ADME/Tox studies on Flavone analogs reveal anticancer activity through Tankyrase inhibition
Source: PubMed Central journal article supplement (PMC6443786; doi:10.1038/s41598-019-41984-7), 2019-04-01
Supplement: 41598_2019_41984_MOESM1_ESM.pdf [file 41598_2019_41984_MOESM1_ESM.pdf]

## 3D-QSAR, Docking, ADME/Tox studies on Flavone analogs reveal anticancer activity through Tankyrase inhibition

Sarfaraz Alam<sup>1,2</sup> and Feroz Khan\*<sup>1,2</sup>

<sup>1</sup>Metabolic & Structural Biology Department, CSIR-Central Institute of Medicinal and Aromatic Plants, P.O.CIMAP, Lucknow, 226015, India

<sup>2</sup>Academy of Scientific and Innovative Research (AcSIR), Ghaziabad- 201002, India

\*Correspondence to be addressed:

Department of Metabolic & Structural Biology,  
CSIR-Central Institute of Medicinal and Aromatic Plants  
PO-CIMAP, Kukrail Picnic Spot Road, Lucknow-226015, Uttar Pradesh, India  
Tel.: +91 522 271 7668, Fax: +91 522 234 2666  
E-mail: [f.khan@cimap.res.in](mailto:f.khan@cimap.res.in)

**Table S1:** Comparison of experimental and predicted activities of training data set molecules based on QSAR model.

| Sr. No. | Title | Structure (SMILE)                                      | Experimental Activity* (μM) | Predicted activity*(μM) | Distance to model |
|---------|-------|--------------------------------------------------------|-----------------------------|-------------------------|-------------------|
| 1.      | FL-1  | <chem>O=C1C=C(Oc2ccccc12)c3ccccc3</chem>               | 6.85                        | 6.2                     | Excellent         |
| 2.      | FL-4  | <chem>Oc1cccc(C2=CC(=O)c3ccccc3O2)c1</chem>            | 6.5                         | 6                       | Excellent         |
| 3.      | FL-6  | <chem>Clc1ccccc1[C@H]2NC(=O)c3ccccc3N2</chem>          | 4.51                        | 4.5                     | Excellent         |
| 4.      | FL-7  | <chem>Oc1ccc(C2=CC(=O)c3ccccc3O2)cc1O</chem>           | 6.77                        | 6.6                     | Excellent         |
| 5.      | FL-8  | <chem>O=C1c2ccccc2N[C@H](N1)c3ccc(cc3)C</chem>         | 5.57                        | 6                       | Excellent         |
| 6.      | FL-9  | <chem>O=C1c2ccccc2N[C@H](N1)c3ccccc3C</chem>           | 4.03                        | 4.3                     | Excellent         |
| 7.      | FL-12 | <chem>O=C1c2ccccc2N[C@H](N1)c3ccccc3C</chem>           | 4.04                        | 4.1                     | Excellent         |
| 8.      | FL-13 | <chem>O=C1C=C(Oc2cc(O)ccc12)c3ccccc(O)c3</chem>        | 6.2                         | 6.1                     | Excellent         |
| 9.      | FL-14 | <chem>O=C1C=C(Oc2ccccc12)c3ccc(C(C)C)cc3</chem>        | 7.14                        | 7.4                     | Excellent         |
| 10.     | FL-15 | <chem>Clc1ccc(C2=Nc3ccccc3C(=O)N2)cc1</chem>           | 7.27                        | 7.4                     | Excellent         |
| 11.     | FL-16 | <chem>Clc1ccccc1[C@@H]2NC(=O)c3ccccc3N2</chem>         | 3.85                        | 4.3                     | Excellent         |
| 12.     | FL-17 | <chem>Clc1ccc([C@@H]2NC(=O)c3ccccc3N2)cc1</chem>       | 6.12                        | 6                       | Excellent         |
| 13.     | FL-18 | <chem>O=C1C=2COCCC2N=C(N1)c3ccccc3</chem>              | 6.87                        | 6.5                     | Excellent         |
| 14.     | FL-19 | <chem>O=C1c2ccccc2N[C@@H](N1)c3ccc(cc3)C</chem>        | 5.27                        | 5.5                     | Excellent         |
| 15.     | FL-20 | <chem>Brc1ccc(C2=Nc3ccccc3C(=O)N2)cc1</chem>           | 7                           | 7.4                     | Excellent         |
| 16.     | FL-21 | <chem>Fe1ccccc1[C@H]2NC(=O)c3ccccc3N2</chem>           | 4.2                         | 3.9                     | Excellent         |
| 17.     | FL-23 | <chem>Oc1ccc(C2=CC(=O)c3ccc(O)cc3O2)cc1O</chem>        | 6.06                        | 6                       | Excellent         |
| 18.     | FL-25 | <chem>O=C1C=C(Oc2ccccc12)c3ccc([N+](=O)[O-])cc3</chem> | 6.85                        | 6.4                     | Excellent         |
| 19.     | FL-27 | <chem>Oc1cc(O)cc2c1C(=O)C=C(O2)c3ccc(O)cc3</chem>      | 5.53                        | 6                       | Excellent         |
| 20.     | FL-29 | <chem>Oc1ccc2C(=O)C=C(Oc2c1)c3ccc(OC)cc3</chem>        | 6.34                        | 6.3                     | Excellent         |
| 21.     | FL-30 | <chem>Oc1cccc2C(=O)NC(=Nc12)c3ccc(C)cc3</chem>         | 7.36                        | 7.1                     | Excellent         |
| 22.     | FL-31 | <chem>Oc1cc(O)cc2c1C(=O)C=C(O2)c3ccc(O)c(O)c3</chem>   | 5.96                        | 6.3                     | Excellent         |
| 23.     | FL-33 | <chem>Clc1ccc(C=2NC(=O)C=3COCCC3N2)cc1</chem>          | 6.83                        | 6.4                     | Excellent         |
| 24.     | FL-34 | <chem>O=C1c2ccccc2N[C@H](N1)c3ccc(OC)cc3</chem>        | 5.67                        | 5.8                     | Excellent         |
| 25.     | FL-36 | <chem>Brc1ccc(C=2NC(=O)C=3COCCC3N2)cc1</chem>          | 7.09                        | 7.5                     | Excellent         |
| 26.     | FL-37 | <chem>O=C1C2=C(N=C(N3CCN(CC3)C)N1)CCCC2</chem>         | 6.52                        | 6.1                     | Excellent         |
| 27.     | FL-38 | <chem>Brc1ccc(C2=Nc3c(O)ccccc3C(=O)N2)cc1</chem>       | 7.82                        | 7.4                     | Excellent         |
| 28.     | FL-40 | <chem>O=C1c2ccccc2N[C@H](N1)c3ccc(C(C)C)cc3</chem>     | 6.45                        | 6                       | Excellent         |
| 29.     | FL-41 | <chem>FC(F)(F)c1ccc(C=2NC(=O)C3=C(N2)CCCC3)cc1</chem>  | 6.79                        | 6.9                     | Excellent         |
| 30.     | FL-42 | <chem>O=C1c2ccccc2N[C@@H](N1)c3ccc(C(C)(C)C)cc3</chem> | 6.82                        | 6.6                     | Excellent         |
| 31.     | FL-45 | <chem>Fe1ccc(C2=Nc3c(O)ccccc3C(=O)N2)cc1</chem>        | 6.58                        | 6.5                     | Excellent         |
| 32.     | FL-46 | <chem>O=C1C=2COCCC2N=C(N1)c3ccc(OC)cc3</chem>          | 7.07                        | 7.1                     | Excellent         |
| 33.     | FL-48 | <chem>Clc1ccc(Cl)ccc1[C@H]2NC(=O)c3ccccc3N2C</chem>    | 4.96                        | 5                       | Excellent         |
| 34.     | FL-51 | <chem>Brc1ccc(C=2NC(=O)c3ccc(OC)c3N2)cc1</chem>        | 6.97                        | 7                       | Excellent         |
| 35.     | FL-52 | <chem>Clc1ccc(C=2NC(=O)c3ccc(OC)c3N2)cc1</chem>        | 7.21                        | 7.4                     | Excellent         |
| 36.     | FL-54 | <chem>Fe1ccc(C=2NC(=O)c3ccc(OC)c3N2)cc1</chem>         | 6.34                        | 6.4                     | Excellent         |
| 37.     | FL-55 | <chem>FC(F)(F)Oc1ccc(C=2NC(=O)C=3COCCC3N2)cc1</chem>   | 7.26                        | 6.7                     | Excellent         |

|     |        |                                                 |      |     |           |
|-----|--------|-------------------------------------------------|------|-----|-----------|
| 38. | FL-56  | O=C1C=2COCCC2N=C(N1)c3ccc(cc3)C(OC)=O           | 6.69 | 7   | Excellent |
| 39. | FL-57  | Oc1cccc2c(O)nc(nc12)-c3ccc(N)cc3                | 6.66 | 6.9 | Excellent |
| 40. | FL-59  | Oc1c2cccc(c2nc(n1)-c3cccc3)C                    | 7.39 | 7.2 | Excellent |
| 41. | FL-60  | Oc1cccc2c(O)nc(nc12)-c3cccc3                    | 6.74 | 6.7 | Excellent |
| 42. | FL-61  | FC(F)(F)c1ccc(cc1)C=2NC(=O)C=3COCCC3N2          | 7.12 | 7   | Excellent |
| 43. | FL-63  | Oc1c2cccc(O)c2nc(n1)-c3ccc(O)cc3                | 7.07 | 7.5 | Excellent |
| 44. | FL-64  | O=C1C=2COCCC2N=C(N1)c3ccc(N(C)C)cc3             | 7.39 | 7.6 | Excellent |
| 45. | FL-65  | Fe1ccc(-c2nc(O)c3cccc3n2)cc1                    | 5.96 | 6.8 | Excellent |
| 46. | FL-67  | O=C1c2cccc(c2N=C(N1)c3ccc(CN)cc3)C              | 7    | 7.5 | Excellent |
| 47. | FL-69  | O=C1C=2COCCC2N=C(N1)c3ccc(C(O)(C)C)cc3          | 7.66 | 7.1 | Excellent |
| 48. | FL-70  | FC(F)(F)c1ccc(-c2cc3c(O)cccc3c(O)n2)cc1         | 7.6  | 7.6 | Excellent |
| 49. | FL-73  | Oc1c2cccc(c2nc(n1)-c3ccc(O)cc3)C                | 8.52 | 8   | Excellent |
| 50. | FL-74  | FC(F)(F)c1ccc(cc1)-c2nc(O)c3CSCc3n2             | 8.3  | 8   | Excellent |
| 51. | FL-75  | FC(F)(F)c1ccc(C=2NC(=O)[C@@H]3CSC[C@H]3N2)cc1   | 6.9  | 7.2 | Excellent |
| 52. | FL-77  | Oc1cccc2c(O)nc(nc12)-c3ccc([N+](=[O-])=O)cc3    | 6.72 | 7.2 | Excellent |
| 53. | FL-90  | Fe1cccc(-c2ccc3C(C)=CC(=O)Nc3c2)c1              | 6.82 | 6.7 | Excellent |
| 54. | FL-94  | FC(F)(F)c1ccc(-c2nc(O)c3cccc(c3n2)C)cc1         | 8    | 7.8 | Excellent |
| 55. | FL-98  | Fe1ccc(-c2ccc3C(C)=CC(=O)Nc3c2)cc1              | 6.51 | 7   | Excellent |
| 56. | FL-99  | Oc1c2cccc(c2nc(n1)-c3ccc([N+](=[O-])=O)cc3)C    | 7.52 | 7.2 | Excellent |
| 57. | FL-109 | O=C1c2cccc(c2N=C(N1)c3ccc(CNC(OC4CCCC4)=O)cc3)C | 7.36 | 7.9 | Excellent |
| 58. | FL-112 | Clc1cc(ccc1-c2ccc3C(C)=CC(=O)Nc3c2)C(O)=O       | 7.68 | 7   | Excellent |
| 59. | FL-116 | O=C1C=C(Oc2cccc12)c3ccc(C)cc3                   | 6.72 | 7.1 | Excellent |
| 60. | FL-117 | Fe1ccc(C2=CC(=O)c3cccc3O2)cc1                   | 5.96 | 6   | Excellent |
| 61. | FL-118 | O=C1c2ccnc2N[C@H](N1)c3cccc3                    | 4.94 | 5   | Excellent |
| 62. | FL-120 | Oc1ccc(C2=Nc3cccc3C(=O)N2)cc1                   | 6.72 | 6.4 | Excellent |
| 63. | FL-121 | Fe1ccc(C2=Nc3c(cccc3C(=O)N2)C)cc1               | 7.4  | 7.3 | Excellent |
| 64. | FL-122 | O=C1C=2COCCC2N=C(N1)c3ccc(cc3)C                 | 7.21 | 7.4 | Excellent |
| 65. | FL-123 | O=C1c2cccc2N=C(N1)c3ccc([N+](=[O-])=O)cc3       | 6.59 | 6.8 | Excellent |
| 66. | FL-124 | O=C1c2cccc2N[C@H](N1)c3ccc(C(C)C)cc3            | 6.64 | 6.9 | Excellent |
| 67. | FL-126 | O=C1c2cccc(OC)c2N=C(N1)c3ccc(C)cc3              | 6.78 | 7.1 | Excellent |
| 68. | FL-130 | Oc1c2cccc(c2nc(n1)-c3ccc(N)cc3)C                | 8.48 | 8   | Excellent |
| 69. | FL-136 | O=C1C=C(c2ccc(cc2N1)-c3cccc3)C                  | 6.74 | 6.7 | Excellent |

\*Experimental and predictive value is in pIC<sub>50</sub>.

**Table S2:** Comparison of experimental and predicted activities of test data set molecules based on QSAR model.

| Sr. No. | Title  | Structure (SMILE)                        | Experimental Activity (μM) | Predicted activity (μM) | Distance to model |
|---------|--------|------------------------------------------|----------------------------|-------------------------|-------------------|
| 1.      | FL-2   | O=C1c2cccc2N[C@H](N1)c3cccc3             | 5.26                       | 5.9                     | Excellent         |
| 2.      | FL-3   | Fe1cccc1[C@H]2NC(=O)c3cccc3N2            | 4.82                       | 4.3                     | Excellent         |
| 3.      | FL-5   | O=C1c2cccc2N=C(c3ccc(cc3)C)C1            | 6.27                       | 7.1                     | Excellent         |
| 4.      | FL-10  | O=C1c2ccnc2C=C(N1)c3cccc3                | 4.97                       | 5.5                     | Excellent         |
| 5.      | FL-11  | Clc1ccc([C@H]2NC(=O)c3cccc3N2)cc1        | 6.39                       | 6.5                     | Excellent         |
| 6.      | FL-22  | O=C1c2cccc2N=C(N1)c3ccc(N)cc3            | 6.16                       | 6.6                     | Excellent         |
| 7.      | FL-26  | O=C1c2cccc(c2N=C(N1)c3ccc(C)cc3)C        | 8.17                       | 7.9                     | Excellent         |
| 8.      | FL-32  | Clc1ccc(C2=Nc3c(cccc3C(=O)N2)C)cc1       | 7.48                       | 7.5                     | Excellent         |
| 9.      | FL-35  | FC(F)(F)c1ccc(C2=Nc3cccc3C(=O)N2)cc1     | 6.88                       | 7.1                     | Excellent         |
| 10.     | FL-39  | Brc1ccc(C2=Nc3c(cccc3C(=O)N2)C)cc1       | 8.26                       | 7.7                     | Excellent         |
| 11.     | FL-43  | Oc1c2cccc2nc(n1)-c3cccc3                 | 5.66                       | 6.6                     | Excellent         |
| 12.     | FL-47  | Clc1ccc(C2=Nc3c(O)cccc3C(=O)N2)cc1       | 7.31                       | 7.3                     | Excellent         |
| 13.     | FL-68  | O=S(=O)(c1ccc(cc1)C=2NC(=O)C=3COCCC3N2)C | 7.2                        | 7                       | Good              |
| 14.     | FL-71  | Oc1c2cccc2nc(n1)-c3ccc(OC)cc3            | 6.21                       | 7                       | Excellent         |
| 15.     | FL-92  | Oc1c2cccc(c2nc(n1)-c3ccc(OC)cc3)C        | 7.92                       | 8                       | Excellent         |
| 16.     | FL-103 | Clc1cc(N)ccc1-c2ccc3C(C)=CC(=O)Nc3c2     | 7.41                       | 6.8                     | Excellent         |
| 17.     | FL-125 | FC(F)(F)c1ccc(C2=NC3=C(SCCC3)C(=O)N2)cc1 | 7.49                       | 7                       | Excellent         |
| 18.     | FL-143 | O=C1C=C(c2ccc(cc2N1)-c3cccc3OC)C         | 5.86                       | 6.6                     | Excellent         |

\*Experimental and predictive value is in pIC<sub>50</sub>.

**Table S3:** 3D-QSAR model statistics.

| Component    | R <sup>2</sup> | Q <sup>2</sup> | Test R <sup>2</sup> |
|--------------|----------------|----------------|---------------------|
| Component 1  | 0.542          | 0.441          | 0.16                |
| Component 2  | 0.718          | 0.57           | 0.519               |
| Component 3  | 0.814          | 0.633          | 0.623               |
| Component 4  | 0.862          | 0.653          | 0.678               |
| Component 5  | 0.886          | 0.666          | 0.75                |
| Component 6  | 0.919          | 0.645          | 0.732               |
| Component 7  | 0.938          | 0.638          | 0.773               |
| Component 8  | 0.953          | 0.631          | 0.798               |
| Component 9  | 0.96           | 0.631          | 0.796               |
| Component 10 | 0.968          | 0.606          | 0.771               |
| Component 11 | 0.974          | 0.61           | 0.761               |
| Component 12 | 0.98           | 0.597          | 0.781               |
| Component 13 | 0.984          | 0.594          | 0.764               |
| Component 14 | 0.988          | 0.582          | 0.747               |
| Component 15 | 0.99           | 0.587          | 0.724               |
| Component 16 | 0.992          | 0.58           | 0.702               |
| Component 17 | 0.994          | 0.57           | 0.675               |
| Component 18 | 0.995          | 0.566          | 0.677               |
| Component 19 | 0.996          | 0.558          | 0.679               |
| Component 20 | 0.997          | 0.546          | 0.689               |

**Table S4:** ADMET Risk screening of query set compounds.

| Sr. No. | Compound Name | ADMET_Risk | Absn_Risk | RuleOf5 | CYP_Risk | MUT_Risk | MUT Code | TOX Risk |
|---------|---------------|------------|-----------|---------|----------|----------|----------|----------|
| 1.      | F1            | 0          | 0         | 0       | 0        | 1        | m1       | 0        |
| 2.      | F2            | 0          | 0         | 0       | 0        | 1        | S1       | 0        |
| 3.      | F3            | 0          | 0         | 0       | 0        | 0        | Nil      | 0        |
| 4.      | F4            | 0          | 0         | 0       | 0        | 1        | S1       | 0        |
| 5.      | F5            | 0          | 0         | 0       | 0        | 1        | S1       | 0        |
| 6.      | F6            | 0          | 0         | 0       | 0        | 1        | m1       | 0        |
| 7.      | F7            | 0          | 0         | 0       | 0        | 1        | S1       | 0        |
| 8.      | F8            | 0          | 0         | 0       | 0        | 1        | m1       | 0        |
| 9.      | F9            | 0          | 0         | 0       | 0        | 1        | S1       | 0        |
| 10.     | F10           | 0          | 0         | 0       | 0        | 1        | m1       | 0        |
| 11.     | F11           | 0          | 0         | 0       | 0        | 0        | Nil      | 0        |
| 12.     | F12           | 0          | 0         | 0       | 0        | 1        | m1       | 0        |
| 13.     | F13           | 0          | 0         | 0       | 0        | 1        | m1       | 0        |
| 14.     | F14           | 0          | 0         | 0       | 0        | 1        | m1       | 0        |
| 15.     | F15           | 0          | 0         | 0       | 0        | 0        | Nil      | 0        |
| 16.     | F16           | 0          | 0         | 0       | 0        | 1        | S1       | 0        |
| 17.     | F17           | 0          | 0         | 0       | 0        | 1        | m1       | 0        |
| 18.     | F18           | 0          | 0         | 0       | 0        | 1        | m1       | 0        |
| 19.     | F19           | 0          | 0         | 0       | 0        | 1        | m1       | 0        |
| 20.     | F20           | 0          | 0         | 0       | 0        | 0        | Nil      | 0        |
| 21.     | F21           | 0          | 0         | 0       | 0        | 0        | Nil      | 0        |
| 22.     | F22           | 0          | 0         | 0       | 0        | 1        | m1       | 0        |
| 23.     | F23           | 0          | 0         | 0       | 0        | 1        | m1       | 0        |
| 24.     | F24           | 0          | 0         | 0       | 0        | 1        | m1       | 0        |

|     |     |   |   |   |   |   |     |   |
|-----|-----|---|---|---|---|---|-----|---|
| 25. | F25 | 0 | 0 | 0 | 0 | 0 | Nil | 0 |
|-----|-----|---|---|---|---|---|-----|---|

**Table S5:** Bio-physicochemical properties of the candidate compound.

| Identifier   | F2     | F3     | F8     | F11    | F13    | F20    | F21    | F25    |
|--------------|--------|--------|--------|--------|--------|--------|--------|--------|
| S+Acidic_pKa | 11.52  | 9.48   | 9.82   | 9.67   | 9.70   | 9.81   | 9.75   | 8.3    |
| DiffCoef     | 0.83   | 0.87   | 0.78   | 0.83   | 0.83   | 0.86   | 0.82   | 0.76   |
| MlogP        | 1.55   | 2.24   | 1.02   | 2.49   | 1.55   | 1.45   | 1.70   | 2.46   |
| S+logP       | 2.86   | 3.09   | 2.40   | 3.32   | 2.9    | 2.42   | 2.67   | 3.51   |
| S+logD       | 2.67   | 2.78   | 2.38   | 3.03   | 2.82   | 2.10   | 2.28   | 3.46   |
| logHLC       | -10.37 | -10.86 | -10.56 | -10.57 | -11.00 | -12.06 | -11.81 | -8.71  |
| S+Peff       | 5.17   | 4.94   | 5.06   | 5.33   | 5.56   | 2.99   | 3.22   | 4.78   |
| S+MDCK       | 581.73 | 338.72 | 699.35 | 480.63 | 600.54 | 137.34 | 189.57 | 811.91 |
| Perm_Cornea  | 151.4  | 123.50 | 102.9  | 130.61 | 154.71 | 59.78  | 65.81  | 138.93 |
| Perm_Skin    | 11.53  | 14.20  | 5.26   | 11.92  | 10.44  | 5.05   | 4.02   | 8.87   |
| S+Sw         | 0.01   | 0.11   | 0.09   | 0.11   | 0.02   | 0.15   | 0.15   | 0.03   |
| S+pH_Satd    | 5.98   | 5.39   | 6.09   | 5.41   | 6.11   | 5.32   | 5.27   | 6.15   |
| S+S_Intrins  | 0.01   | 0.11   | 0.09   | 0.11   | 0.02   | 0.15   | 0.15   | 0.03   |
| SolFactor    | 751.45 | 217.63 | 268.55 | 222.10 | 611.53 | 184.3  | 192.47 | 507.45 |
| S+S_pH       | 0.02   | 0.21   | 0.1    | 0.21   | 0.02   | 0.31   | 0.36   | 0.03   |
| S+FaSSGF     | 0.08   | 0.07   | 0.05   | 0.05   | 0.04   | 0.12   | 0.09   | 0.04   |
| S+FaSSIF     | 0.18   | 0.16   | 0.19   | 0.14   | 0.12   | 0.35   | 0.38   | 0.04   |
| S+FeSSIF     | 0.34   | 0.44   | 0.26   | 0.39   | 0.25   | 0.47   | 0.48   | 0.17   |
| SupSatn      | SupSat | SupSat | SupSat | SupSat | SupSat | SupSat | SupSat | SupSat |
| BBB_Filter   | Low    | Low    | Low    | Low    | Low    | Low    | Low    | Low    |
| LogBB        | -0.39  | -0.29  | -0.47  | -0.35  | -0.49  | -0.39  | -0.52  | -0.21  |
| PrUnbnd      | 3.16   | 2.83   | 7.1    | 2.31   | 4.33   | 4.51   | 3.21   | 3.59   |
| Vd           | 0.58   | 0.45   | 1.05   | 0.5    | 1.4    | 0.38   | 0.37   | 1.35   |
| RBP          | 0.53   | 1.08   | 0.54   | 0.87   | 0.73   | 1.06   | 0.85   | 0.87   |
| S+fumic      | 0.62   | 0.57   | 0.70   | 0.51   | 0.59   | 0.74   | 0.7    | 0.4    |
| Pgp_Substr   | No     | No     | No     | No     | No     | No     | No     | No     |
| Pgp_Inh      | Yes    | No     | No     | No     | No     | No     | No     | No     |
| OATP1B1_Inh  | No     | No     | No     | No     | No     | No     | No     | No     |
| HIVI-ST      | 4.37   | 4.03   | 4.97   | 4.16   | 4.65   | 4.09   | 4.32   | 4.17   |
| HIVI-TC      | 4.32   | 3.75   | 4.46   | 3.81   | 4.27   | 3.98   | 3.99   | 3.81   |
| Absn_Risk    | 0      | 0      | 0      | 0      | 0      | 0      | 0      | 0      |
| RuleOf5      | 0      | 0      | 0      | 0      | 0      | 0      | 0      | 0      |

**Table S6:** Metabolism study of the candidate compound.

| Identifier    | F2                                 | F3                  | F8                                 | F11           | F13                               | F20           | F21                                           | F25               |
|---------------|------------------------------------|---------------------|------------------------------------|---------------|-----------------------------------|---------------|-----------------------------------------------|-------------------|
| CYP1A2_Inh    | Yes                                | Yes                 | Yes                                | Yes           | Yes                               | Yes           | Yes                                           | Yes               |
| CYP1A2_Substr | Yes                                | Yes                 | Yes                                | Yes           | Yes                               | Yes           | Yes                                           | No                |
| CYP1A2_Sites  | C14(933);<br>C13(767);<br>C15(767) | C2(920);<br>C6(560) | C23(944);<br>C21(648);<br>C15(585) | C2(862)       | C21(970);<br>C2(840);<br>C15(628) | C2(917)       | C15(388);<br>C13(388);<br>C6(236);<br>C8(226) | Non-Substrate     |
| CYP1A2_Km     | 28.53                              | 33.79               | 18.55                              | 16.59         | 7.42                              | 158.31        | 49.91                                         | Non-Substrate     |
| CYP1A2_Vmax   | 1.76                               | 4.22                | 5.34                               | 1.18          | 1.99                              | 5.19          | 8.04                                          | Non-Substrate     |
| CYP1A2_CLint  | 3.21                               | 6.49                | 14.96                              | 3.69          | 13.92                             | 1.70          | 8.37                                          | Non-Substrate     |
| CYP2A6_Substr | No                                 | No                  | No                                 | No            | No                                | No            | No                                            | No                |
| CYP2A6_Sites  | Non-Substrate                      | Non-Substrate       | Non-Substrate                      | Non-Substrate | Non-Substrate                     | Non-Substrate | Non-Substrate                                 | Non-Substrate     |
| CYP2B6_Substr | No                                 | No                  | No                                 | No            | No                                | No            | No                                            | Yes               |
| CYP2B6_Sites  | Non-Substrate                      | Non-Substrate       | Non-Substrate                      | Non-Substrate | Non-Substrate                     | Non-Substrate | Non-Substrate                                 | C22(799); C8(731) |
| CYP2C8_Substr | Yes                                | No                  | No                                 | No            | No                                | No            | No                                            | No                |



|         |     |     |     |     |     |     |     |     |
|---------|-----|-----|-----|-----|-----|-----|-----|-----|
| UGT2B7  | Yes | No  | No  | No  | No  | No  | No  | No  |
| UGT2B15 | Yes | Yes | Yes | Yes | Yes | Yes | Yes | Yes |

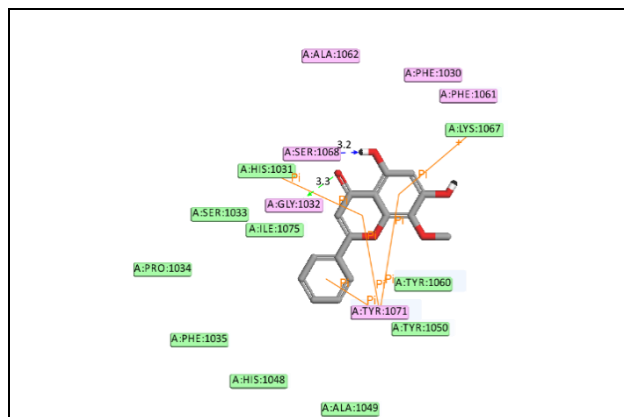

Compound F2

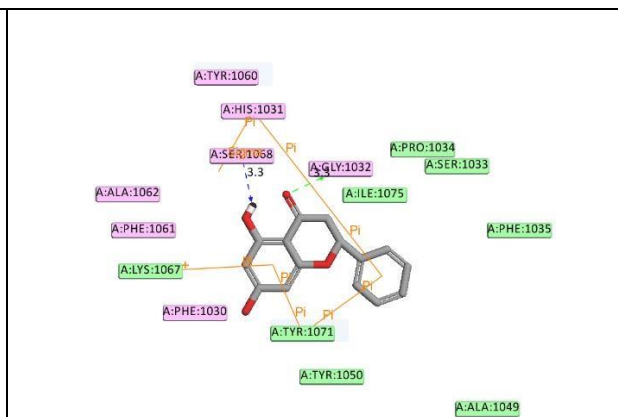

Compound F3

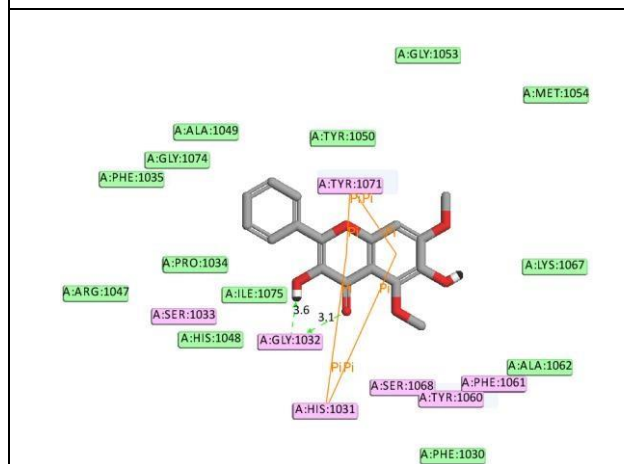

Compound F8

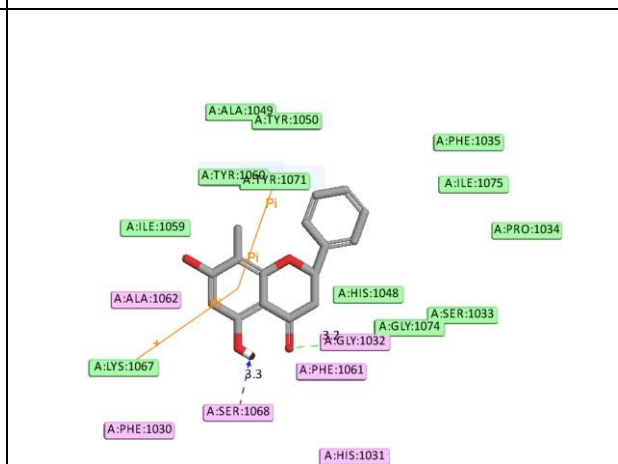

Compound F11

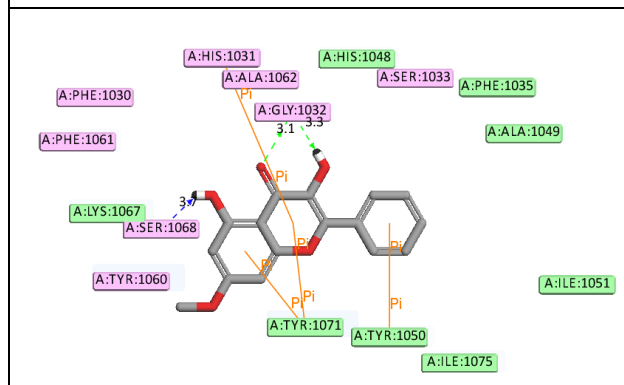

Compound F13

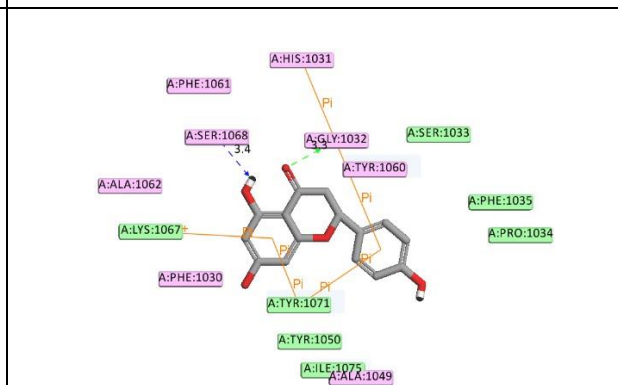

Compound F20

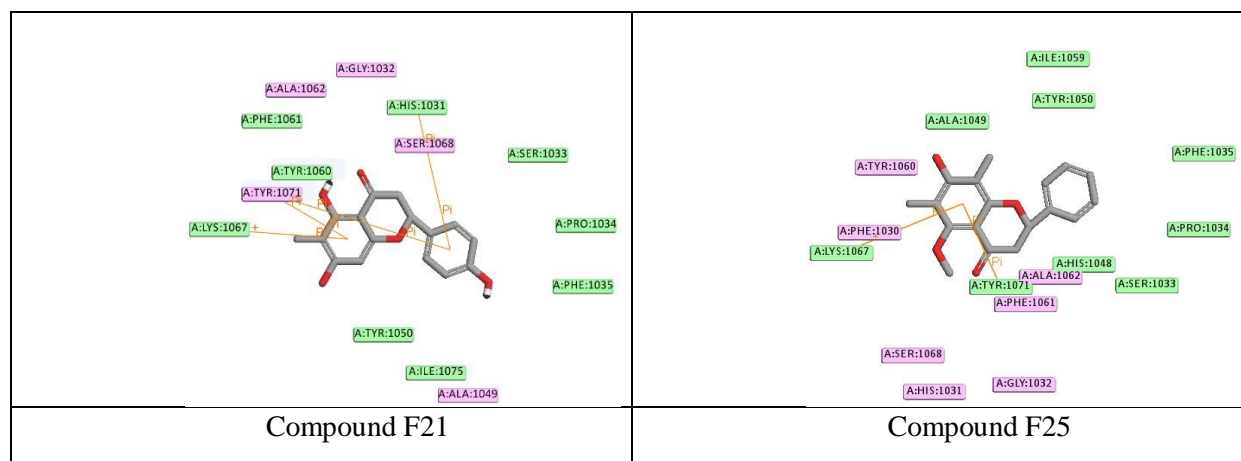

**Figure S1:** Two-dimensional diagrams illustrating protein-ligand interactions between candidate compounds and target receptor. Broken arrow represents the hydrogen bonding, and orange line represents the pi-interactions with length in Å.

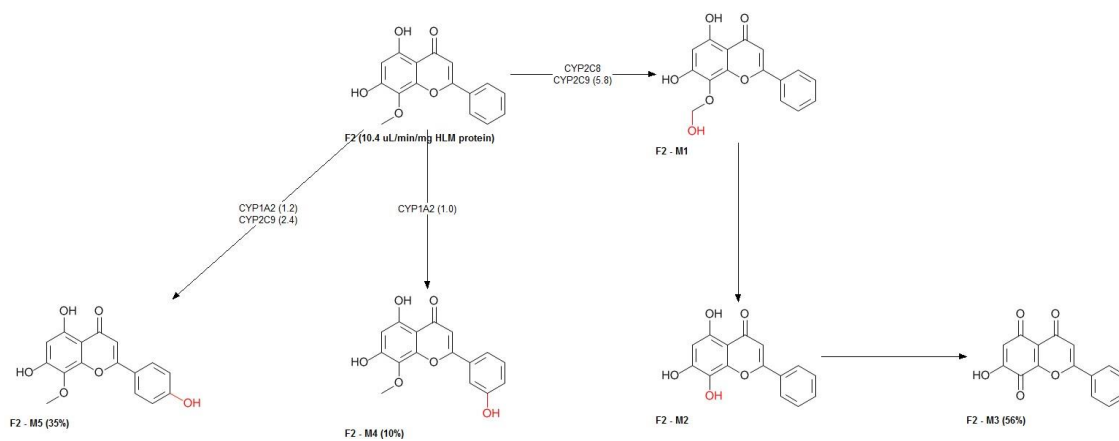

**Figure S4.6.2a:** The predictive metabolites and sites of metabolism of candidate compound F2.

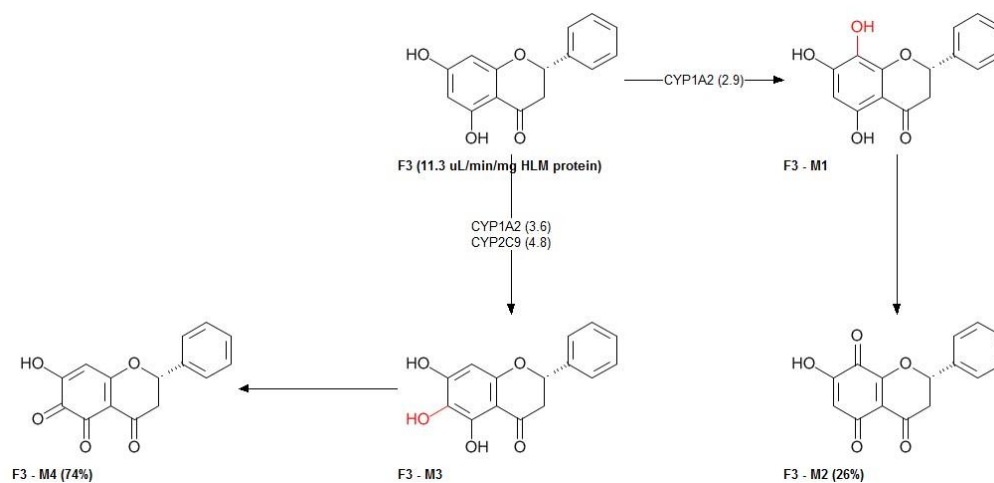

**Figure S4.6.2b:** The predictive metabolites and sites of metabolism of candidate compound F3.

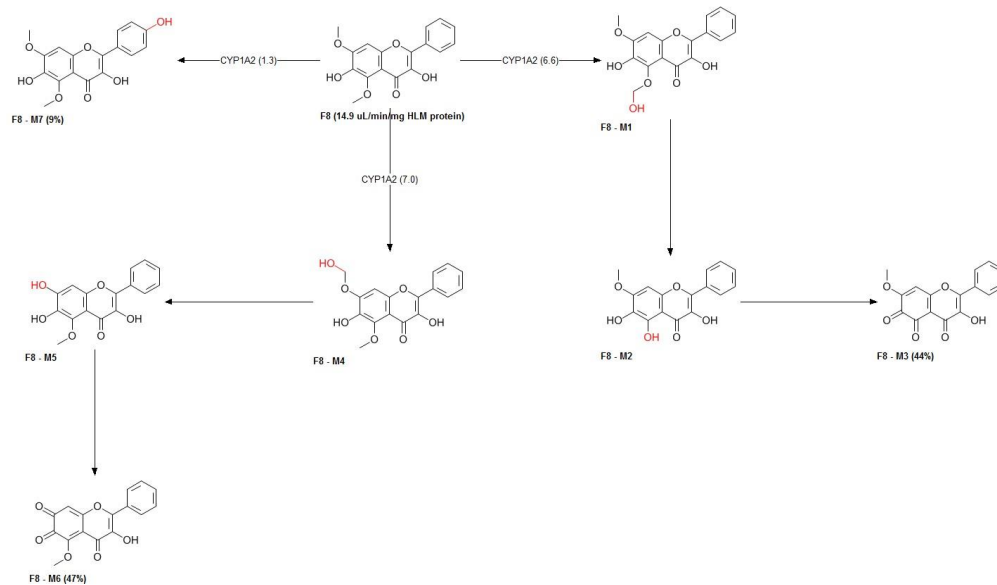

**Figure S2c:** The predictive metabolites and sites of metabolism of candidate compound F8.

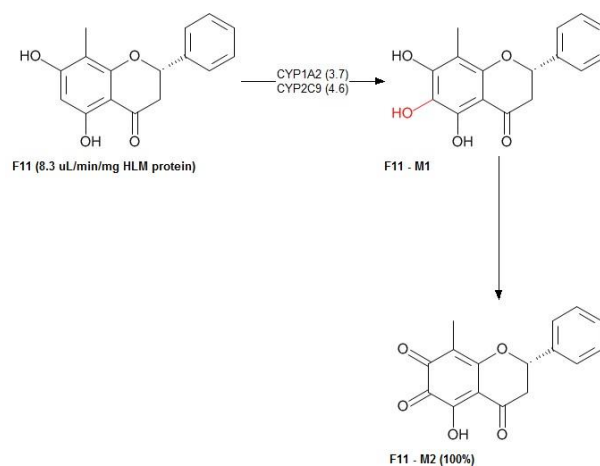

**Figure Sd:** The predictive metabolites and sites of metabolism of candidate compound F11.

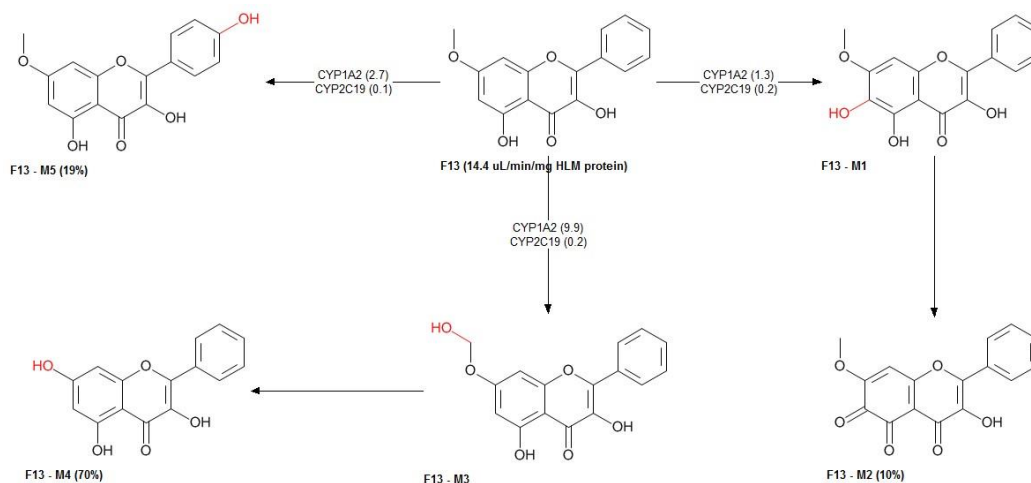

**Figure S2e:** The predictive metabolites and sites of metabolism of candidate compound F13.



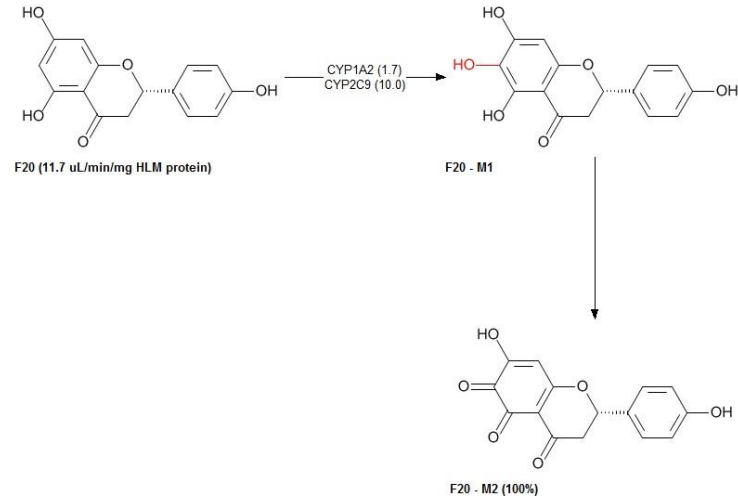

**Figure S2f:** The predictive metabolites and sites of metabolism of candidate compound F20.

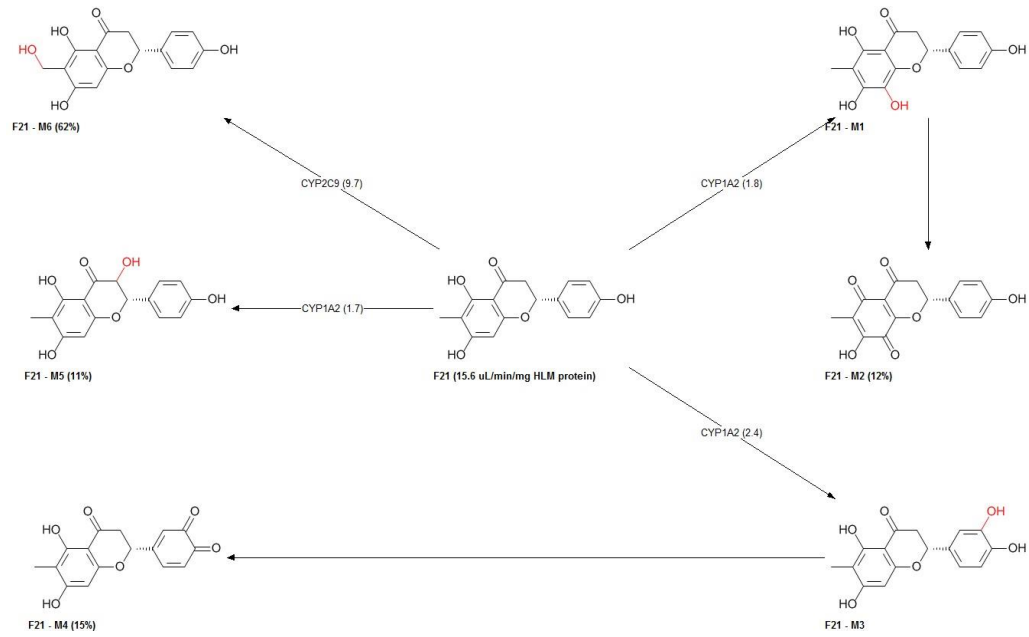

**Figure S2g:** The predictive metabolites and sites of metabolism of candidate compound F21.

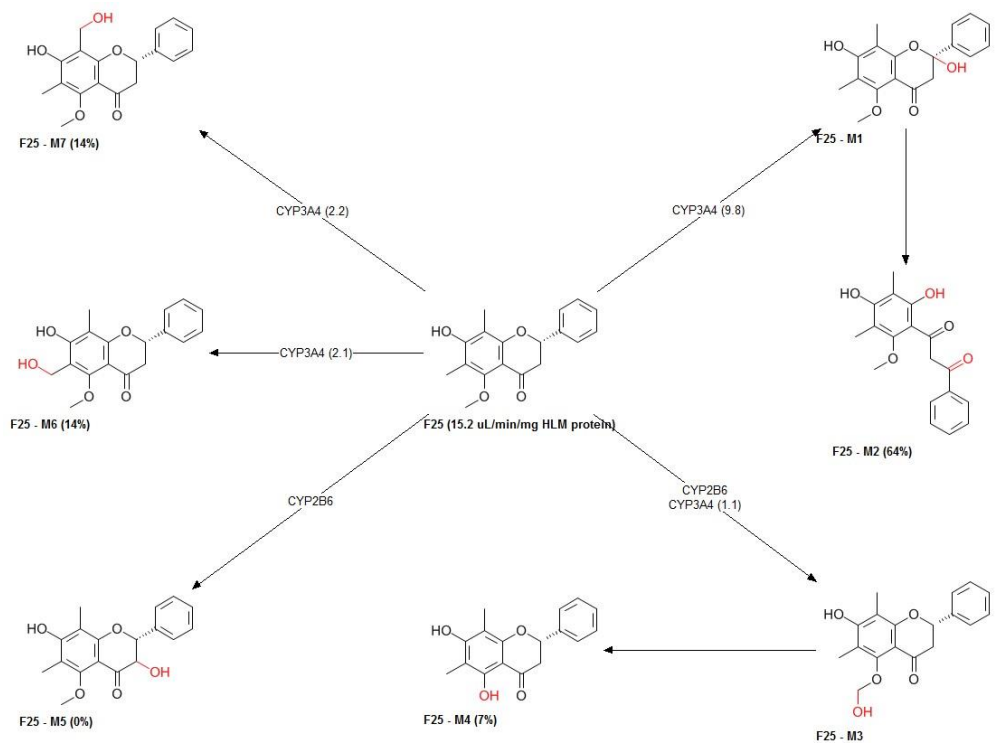

**Figure S2h:** The predictive metabolites and sites of metabolism of candidate compound F25.
